# Supplementary material for: Genetic Mapping Reveals Complex Architecture and Candidate Genes Involved in Common Bean Response to&nbsp;Meloidogyne Incognita&nbsp;Infection
Source: Research Square preprint supplement (doi:10.21203/rs.3.rs-305996/v1), 2021-03-17
Supplement: Supplementary file 1 [file c84a1d666f0ac6cd549a6191.xlsx]

## Sheet: Online Resource 7
Online Resource 7 Functional annotation and ontology terms predicted for the candidate genes located on genomic regions significantly associated with egg-masses and root-galling index.
Egg Masses
Gene ID	Functional Annotation	Gene Ontology ID	Gene Ontology Terms
Phvul.006G051000	beta-(1,2)-xylosyltransferase	C:GO:0000139; C:GO:0005797; P:GO:0006487; C:GO:0016021; P:GO:0031204; P:GO:0048367; F:GO:0050513	C:Golgi membrane; C:Golgi medial cisterna; P:protein N-linked glycosylation; C:integral component of membrane; P:posttranslational protein targeting to membrane, translocation; P:shoot system development; F:glycoprotein 2-beta-D-xylosyltransferase activity
Phvul.006G051100	uncharacterized protein LOC115708834	C:GO:0016021	C:integral component of membrane
Phvul.006G051200	ankyrin repeat-containing protein At5g02620-like isoform X2	C:GO:0016021	C:integral component of membrane
Phvul.006G051300	40S ribosomal protein S8-like	P:GO:0000462; F:GO:0003735; P:GO:0006412; C:GO:0022627	P:maturation of SSU-rRNA from tricistronic rRNA transcript (SSU-rRNA, 5.8S rRNA, LSU-rRNA); F:structural constituent of ribosome; P:translation; C:cytosolic small ribosomal subunit
Phvul.006G051400	probable cytokinin riboside 5'-monophosphate phosphoribohydrolase LOGL3	F:GO:0016787	F:hydrolase activity
Phvul.006G051500	disease resistance protein RPM1	F:GO:0043531	F:ADP binding
Phvul.006G051600	F-box protein At1g30790
Phvul.006G051700	protein PRD1	P:GO:0042138	P:meiotic DNA double-strand break formation
Phvul.006G051800	F-box protein At1g30790
Phvul.006G051900	putative F-box protein At1g47790
Phvul.006G052000	protein transport protein SEC23-like	C:GO:0000139; F:GO:0005096; C:GO:0005789; P:GO:0006886; F:GO:0008270; C:GO:0030127; P:GO:0043547; C:GO:0070971; P:GO:0090110	C:Golgi membrane; F:GTPase activator activity; C:endoplasmic reticulum membrane; P:intracellular protein transport; F:zinc ion binding; C:COPII vesicle coat; P:positive regulation of GTPase activity; C:endoplasmic reticulum exit site; P:COPII-coated vesicle cargo loading
Phvul.006G052100	putative F-box protein At1g47790
Phvul.006G052200	ABC transporter C family member 3 isoform X1	C:GO:0000325; F:GO:0005524; C:GO:0005774; C:GO:0016021; F:GO:0016887; F:GO:0042626; P:GO:0055085	C:plant-type vacuole; F:ATP binding; C:vacuolar membrane; C:integral component of membrane; F:ATPase activity; F:ATPase-coupled transmembrane transporter activity; P:transmembrane transport
Phvul.006G052300	disease resistance protein RPM1-like	F:GO:0043531	F:ADP binding
Phvul.006G052400	disease resistance protein RPM1-like	F:GO:0043531	F:ADP binding
Phvul.006G052500	disease resistance protein RPM1	F:GO:0043531	F:ADP binding
Phvul.006G052600	disease resistance protein RPM1-like isoform X2	F:GO:0043531	F:ADP binding
Phvul.006G052700	kinesin-like protein KIN-12F	F:GO:0005524; C:GO:0005871; C:GO:0005874; P:GO:0007018; F:GO:0008017; F:GO:0008574	F:ATP binding; C:kinesin complex; C:microtubule; P:microtubule-based movement; F:microtubule binding; F:ATP-dependent microtubule motor activity, plus-end-directed
Phvul.006G052800	hypothetical protein PHAVU_006G052800g
Phvul.006G052900	protein TORNADO 1
Phvul.006G053000	heterogeneous nuclear ribonucleoprotein 1-like	F:GO:0003723; C:GO:0005634; C:GO:1990904	F:RNA binding; C:nucleus; C:ribonucleoprotein complex
Phvul.006G053100	probable serine/threonine-protein kinase WNK11	F:GO:0004674; F:GO:0005524; C:GO:0005737; P:GO:0006468; P:GO:0035556	F:protein serine/threonine kinase activity; F:ATP binding; C:cytoplasm; P:protein phosphorylation; P:intracellular signal transduction
Phvul.006G053200	FRIGIDA-like protein 1	P:GO:0009908; P:GO:0030154	P:flower development; P:cell differentiation
Phvul.006G053300	probable WRKY transcription factor 20 isoform X1	F:GO:0003700; C:GO:0005634; P:GO:0006355; F:GO:0043565	F:DNA-binding transcription factor activity; C:nucleus; P:regulation of transcription, DNA-templated; F:sequence-specific DNA binding
Phvul.007G246400	methyltransferase-like protein 13	F:GO:0008171; P:GO:0032259	F:O-methyltransferase activity; P:methylation
Phvul.007G246300	BLOC-1-related complex subunit 8 homolog isoform X3
Phvul.007G246500	protein FLOWERING LOCUS D	F:GO:0003677; F:GO:0008168; P:GO:0032259; F:GO:0052894; F:GO:0052895; F:GO:0052901; P:GO:0055114	F:DNA binding; F:methyltransferase activity; P:methylation; F:norspermine:oxygen oxidoreductase activity; F:N1-acetylspermine:oxygen oxidoreductase (N1-acetylspermidine-forming) activity; F:spermine:oxygen oxidoreductase (spermidine-forming) activity; P:oxidation-reduction process
Phvul.007G246600	receptor-like protein EIX2	C:GO:0016021; F:GO:0016301; P:GO:0016310	C:integral component of membrane; F:kinase activity; P:phosphorylation
Phvul.007G246700	probable pectinesterase/pectinesterase inhibitor 41	F:GO:0030599; P:GO:0042545; P:GO:0043086; F:GO:0045330; P:GO:0045490; F:GO:0046910	F:pectinesterase activity; P:cell wall modification; P:negative regulation of catalytic activity; F:aspartyl esterase activity; P:pectin catabolic process; F:pectinesterase inhibitor activity
Phvul.007G246800	pectinesterase inhibitor-like	F:GO:0030599; P:GO:0043086; F:GO:0046910	F:pectinesterase activity; P:negative regulation of catalytic activity; F:pectinesterase inhibitor activity
Phvul.007G246900	hypothetical protein PHAVU_007G246900g
Phvul.007G247000	zinc finger protein ZOP1	P:GO:0000398; F:GO:0003690; F:GO:0003725; F:GO:0008270; P:GO:0009845; C:GO:0015030; P:GO:0080188	P:mRNA splicing, via spliceosome; F:double-stranded DNA binding; F:double-stranded RNA binding; F:zinc ion binding; P:seed germination; C:Cajal body; P:RNA-directed DNA methylation
Phvul.007G247100	hypothetical protein PHAVU_007G247100g
Phvul.007G247200	pleiotropic drug resistance protein 2-like	F:GO:0005524; C:GO:0005886; C:GO:0016021; F:GO:0016887; F:GO:0042626; P:GO:0055085	F:ATP binding; C:plasma membrane; C:integral component of membrane; F:ATPase activity; F:ATPase-coupled transmembrane transporter activity; P:transmembrane transport
Phvul.007G247300	hypothetical protein PHAVU_007G247300g	F:GO:0004402; P:GO:0006357; P:GO:0016573; C:GO:0032777	F:histone acetyltransferase activity; P:regulation of transcription by RNA polymerase II; P:histone acetylation; C:Piccolo NuA4 histone acetyltransferase complex
Phvul.007G247400	exocyst complex component SEC15A	C:GO:0000145; P:GO:0006893; P:GO:0006904	C:exocyst; P:Golgi to plasma membrane transport; P:vesicle docking involved in exocytosis
Phvul.008G247700	extra-large guanine nucleotide-binding protein 3-like
Phvul.008G247800	transcription factor RF2b-like	F:GO:0003700; C:GO:0005634; P:GO:0006355	F:DNA-binding transcription factor activity; C:nucleus; P:regulation of transcription, DNA-templated
Phvul.008G247900	hypothetical protein PHAVU_008G247900g
Phvul.008G248000	expansin-A8	C:GO:0005576; C:GO:0005618; P:GO:0009664; C:GO:0016020	C:extracellular region; C:cell wall; P:plant-type cell wall organization; C:membrane
Phvul.008G248100	hypothetical protein PHAVU_008G248100g
Phvul.008G248200	probable serine/threonine-protein kinase WNK4	F:GO:0004674; F:GO:0005524; C:GO:0005737; P:GO:0006468; P:GO:0035556	F:protein serine/threonine kinase activity; F:ATP binding; C:cytoplasm; P:protein phosphorylation; P:intracellular signal transduction
Phvul.008G248300	transcription repressor OFP4-like	F:GO:0003677; P:GO:0045892	F:DNA binding; P:negative regulation of transcription, DNA-templated
Phvul.008G248400	transcription repressor OFP17
Phvul.008G248500	protein GRAVITROPIC IN THE LIGHT 1 isoform X2	P:GO:0009639; P:GO:0009959	P:response to red or far red light; P:negative gravitropism
Phvul.008G248600	premnaspirodiene oxygenase-like	F:GO:0005506; C:GO:0016021; F:GO:0016709; F:GO:0020037; P:GO:0055114	F:iron ion binding; C:integral component of membrane; F:oxidoreductase activity, acting on paired donors, with incorporation or reduction of molecular oxygen, NAD(P)H as one donor, and incorporation of one atom of oxygen; F:heme binding; P:oxidation-reduction process
Phvul.008G248700	EPIDERMAL PATTERNING FACTOR-like protein 6	P:GO:0010052; C:GO:0016021	P:guard cell differentiation; C:integral component of membrane
Phvul.008G248800	CBL-interacting serine/threonine-protein kinase 11	F:GO:0004674; F:GO:0005524; C:GO:0005634; C:GO:0005737; P:GO:0006468; P:GO:0035556	F:protein serine/threonine kinase activity; F:ATP binding; C:nucleus; C:cytoplasm; P:protein phosphorylation; P:intracellular signal transduction
Phvul.008G248900	CBL-interacting serine/threonine-protein kinase 10-like	F:GO:0004674; F:GO:0005524; P:GO:0006468; P:GO:0007165; C:GO:0016021	F:protein serine/threonine kinase activity; F:ATP binding; P:protein phosphorylation; P:signal transduction; C:integral component of membrane
Phvul.008G249000	serine/arginine repetitive matrix protein 2-like
Phvul.008G249100	LOB domain-containing protein 13 isoform X2
Phvul.008G249200	putative pentatricopeptide repeat-containing protein At1g12700, mitochondrial
Phvul.008G249300	tyrosine--tRNA ligase, chloroplastic/mitochondrial	F:GO:0003723; F:GO:0004831; F:GO:0005524; C:GO:0005739; C:GO:0005829; P:GO:0006437; C:GO:0009570	F:RNA binding; F:tyrosine-tRNA ligase activity; F:ATP binding; C:mitochondrion; C:cytosol; P:tyrosyl-tRNA aminoacylation; C:chloroplast stroma
Phvul.008G249400	U-box domain-containing protein 4-like	F:GO:0004842; C:GO:0005634; C:GO:0005737; P:GO:0016567	F:ubiquitin-protein transferase activity; C:nucleus; C:cytoplasm; P:protein ubiquitination
Phvul.008G249500	peroxidase 4	F:GO:0004601; C:GO:0005576; P:GO:0006979; F:GO:0020037; P:GO:0042744; F:GO:0046872; P:GO:0055114; P:GO:0098869	F:peroxidase activity; C:extracellular region; P:response to oxidative stress; F:heme binding; P:hydrogen peroxide catabolic process; F:metal ion binding; P:oxidation-reduction process; P:cellular oxidant detoxification
Phvul.008G249600	biogenesis of lysosome-related organelles complex 1 subunit 1	P:GO:0016197; C:GO:0031083	P:endosomal transport; C:BLOC-1 complex
Phvul.008G249700	peroxidase P7-like	F:GO:0004601; C:GO:0005576; P:GO:0006979; C:GO:0016021; F:GO:0020037; P:GO:0042744; F:GO:0046872; P:GO:0055114; P:GO:0098869	F:peroxidase activity; C:extracellular region; P:response to oxidative stress; C:integral component of membrane; F:heme binding; P:hydrogen peroxide catabolic process; F:metal ion binding; P:oxidation-reduction process; P:cellular oxidant detoxification
Phvul.008G249800	cationic peroxidase 1-like	F:GO:0004601; C:GO:0005576; P:GO:0006979; C:GO:0016021; F:GO:0020037; P:GO:0042744; F:GO:0046872; P:GO:0055114; P:GO:0098869	F:peroxidase activity; C:extracellular region; P:response to oxidative stress; C:integral component of membrane; F:heme binding; P:hydrogen peroxide catabolic process; F:metal ion binding; P:oxidation-reduction process; P:cellular oxidant detoxification
Phvul.008G249900	cationic peroxidase 1-like	F:GO:0004601; C:GO:0005576; P:GO:0006979; F:GO:0020037; P:GO:0042744; F:GO:0046872; P:GO:0055114; P:GO:0098869	F:peroxidase activity; C:extracellular region; P:response to oxidative stress; F:heme binding; P:hydrogen peroxide catabolic process; F:metal ion binding; P:oxidation-reduction process; P:cellular oxidant detoxification
Phvul.008G250000	protein TIC110, chloroplastic	P:GO:0009658; C:GO:0009941; C:GO:0016021; P:GO:0045037; C:GO:0061927	P:chloroplast organization; C:chloroplast envelope; C:integral component of membrane; P:protein import into chloroplast stroma; C:TOC-TIC supercomplex I
Phvul.008G250100	putative tRNA pseudouridine synthase isoform X1	F:GO:0003723; P:GO:0031119; F:GO:0106029	F:RNA binding; P:tRNA pseudouridine synthesis; F:tRNA pseudouridine synthase activity
Phvul.008G250200	putative tRNA pseudouridine synthase	F:GO:0003723; F:GO:0009982; P:GO:0031119	F:RNA binding; F:pseudouridine synthase activity; P:tRNA pseudouridine synthesis
Phvul.008G250300	hypothetical protein PHAVU_008G250300g
Phvul.008G250400	hypothetical protein PHAVU_008G250400g
Phvul.008G250500	protein NUCLEAR FUSION DEFECTIVE 4	C:GO:0016021	C:integral component of membrane
Phvul.008G250600	probable O-methyltransferase 3	F:GO:0008171; F:GO:0008757; P:GO:0019438; P:GO:0032259; F:GO:0046983	F:O-methyltransferase activity; F:S-adenosylmethionine-dependent methyltransferase activity; P:aromatic compound biosynthetic process; P:methylation; F:protein dimerization activity
Phvul.008G250700	probable O-methyltransferase 3	F:GO:0016206; P:GO:0019438; P:GO:0032259; F:GO:0046983; F:GO:0102084; F:GO:0102938	F:catechol O-methyltransferase activity; P:aromatic compound biosynthetic process; P:methylation; F:protein dimerization activity; F:L-dopa O-methyltransferase activity; F:orcinol O-methyltransferase activity
Phvul.008G250800	protein LURP-one-related 7 isoform X1	C:GO:0005886; C:GO:0016021	C:plasma membrane; C:integral component of membrane
Phvul.008G250900	E3 ubiquitin-protein ligase listerin	C:GO:0005829; F:GO:0008270; P:GO:0016567; F:GO:0016874; F:GO:0043023; F:GO:0061630; P:GO:0072344; C:GO:1990112; P:GO:1990116	C:cytosol; F:zinc ion binding; P:protein ubiquitination; F:ligase activity; F:ribosomal large subunit binding; F:ubiquitin protein ligase activity; P:rescue of stalled ribosome; C:RQC complex; P:ribosome-associated ubiquitin-dependent protein catabolic process
Phvul.008G251000	wound-induced protein 1-like
Phvul.011G181400	TMV resistance protein N isoform X1	P:GO:0007165; F:GO:0043531	P:signal transduction; F:ADP binding
Phvul.011G181500	putative disease resistance protein At3g14460	F:GO:0043531	F:ADP binding
Phvul.011G181600	putative disease resistance RPP13-like protein 1	F:GO:0043531	F:ADP binding
Phvul.011G181700	putative disease resistance protein At3g14460	F:GO:0043531	F:ADP binding
Phvul.011G181800	potassium channel KAT1	F:GO:0005249; C:GO:0016021; P:GO:0071805	F:voltage-gated potassium channel activity; C:integral component of membrane; P:potassium ion transmembrane transport
Phvul.011G181900	putative kinase-like protein TMKL1	F:GO:0004672; F:GO:0005524; P:GO:0006468; C:GO:0016021	F:protein kinase activity; F:ATP binding; P:protein phosphorylation; C:integral component of membrane
Phvul.011G182000	diphthine methyltransferase homolog isoform X1	F:GO:0008168; P:GO:0032259	F:methyltransferase activity; P:methylation
Phvul.011G182100	60S ribosomal protein L11	P:GO:0000027; F:GO:0003735; P:GO:0006412; C:GO:0022625	P:ribosomal large subunit assembly; F:structural constituent of ribosome; P:translation; C:cytosolic large ribosomal subunit
Phvul.011G182200	embryonic abundant protein VF30.1-like
Phvul.011G182300	probable leucine-rich repeat receptor-like protein kinase At1g35710	F:GO:0004672; F:GO:0005524; C:GO:0005886; P:GO:0006468; C:GO:0016021	F:protein kinase activity; F:ATP binding; C:plasma membrane; P:protein phosphorylation; C:integral component of membrane
Phvul.011G182400	acid phosphatase 1	F:GO:0003993; P:GO:0016311	F:acid phosphatase activity; P:dephosphorylation
Phvul.011G182500	MLP-like protein 43	P:GO:0006952; C:GO:0016021	P:defense response; C:integral component of membrane
Phvul.011G182600	MLP-like protein 43	P:GO:0006952; C:GO:0016021	P:defense response; C:integral component of membrane
Phvul.011G182700	MLP-like protein 43	P:GO:0006952	P:defense response
Phvul.011G182800	MLP-like protein 43	P:GO:0006952	P:defense response
Phvul.011G182900	MLP-like protein 43	P:GO:0006952	P:defense response
Phvul.011G183000	MLP-like protein 43	P:GO:0006952	P:defense response
Phvul.011G183100	MLP-like protein 43	P:GO:0006952	P:defense response
Phvul.011G183200	N-terminal acetyltransferase A complex catalytic subunit NAA10	P:GO:0017198; P:GO:0018002; C:GO:0031415; F:GO:1990189; F:GO:1990190	P:N-terminal peptidyl-serine acetylation; P:N-terminal peptidyl-glutamic acid acetylation; C:NatA complex; F:peptide-serine-N-acetyltransferase activity; F:peptide-glutamate-N-acetyltransferase activity
Phvul.011G183300	MLP-like protein 43	P:GO:0006952	P:defense response
Phvul.011G183400	MLP-like protein 43	P:GO:0006952; C:GO:0016021	P:defense response; C:integral component of membrane
Phvul.011G183500	MLP-like protein 43	P:GO:0006952; C:GO:0016021	P:defense response; C:integral component of membrane
Root-galling Index
Gene ID	Functional Annotation	Gene Ontology ID	Gene Ontology Terms
Phvul.001G199900	rhomboid-like protein 15	C:GO:0000839; F:GO:0004252; C:GO:0030176; P:GO:0030433; P:GO:0030968; F:GO:0051787; F:GO:1990381	C:Hrd1p ubiquitin ligase ERAD-L complex; F:serine-type endopeptidase activity; C:integral component of endoplasmic reticulum membrane; P:ubiquitin-dependent ERAD pathway; P:endoplasmic reticulum unfolded protein response; F:misfolded protein binding; F:ubiquitin-specific protease binding
Phvul.001G200000	eukaryotic translation initiation factor 3 subunit C	P:GO:0001732; F:GO:0003743; C:GO:0005852; C:GO:0016282; F:GO:0031369; C:GO:0033290	P:formation of cytoplasmic translation initiation complex; F:translation initiation factor activity; C:eukaryotic translation initiation factor 3 complex; C:eukaryotic 43S preinitiation complex; F:translation initiation factor binding; C:eukaryotic 48S preinitiation complex
Phvul.001G200100	TNF receptor-associated factor family protein DDB_G0290931	F:GO:0008270	F:zinc ion binding
Phvul.001G200200	splicing factor 3B subunit 3 isoform X1	F:GO:0003684; C:GO:0005634; P:GO:0043161	F:damaged DNA binding; C:nucleus; P:proteasome-mediated ubiquitin-dependent protein catabolic process
Phvul.001G200300	serine/threonine-protein phosphatase PP2A catalytic subunit	C:GO:0000159; F:GO:0004721; F:GO:0005515; C:GO:0005730; C:GO:0005829; P:GO:0006470; P:GO:0006952; F:GO:0046872	C:protein phosphatase type 2A complex; F:phosphoprotein phosphatase activity; F:protein binding; C:nucleolus; C:cytosol; P:protein dephosphorylation; P:defense response; F:metal ion binding
Phvul.001G200400	lipid phosphate phosphatase delta	F:GO:0008195; C:GO:0016021; P:GO:0016311	F:phosphatidate phosphatase activity; C:integral component of membrane; P:dephosphorylation
Phvul.001G200500	hypothetical protein PHAVU_001G200500g
Phvul.001G200600	protein WHAT'S THIS FACTOR 9, mitochondrial
Phvul.001G200700	carbon catabolite repressor protein 4 homolog 1	P:GO:0000289; F:GO:0004535; C:GO:0005634; C:GO:0005737; C:GO:0030014; P:GO:0090503	P:nuclear-transcribed mRNA poly(A) tail shortening; F:poly(A)-specific ribonuclease activity; C:nucleus; C:cytoplasm; C:CCR4-NOT complex; P:RNA phosphodiester bond hydrolysis, exonucleolytic
Phvul.001G200800	hypothetical protein PHAVU_001G200800g
Phvul.001G200900	60S ribosomal protein L21-1	F:GO:0003735; P:GO:0006412; C:GO:0022625	F:structural constituent of ribosome; P:translation; C:cytosolic large ribosomal subunit
Phvul.001G201000	60S ribosomal protein L21-1	F:GO:0003735; P:GO:0006412; C:GO:0022625	F:structural constituent of ribosome; P:translation; C:cytosolic large ribosomal subunit
Phvul.001G201100	NPL4-like protein 1	C:GO:0005634; P:GO:0006511; F:GO:0031625; F:GO:0043130	C:nucleus; P:ubiquitin-dependent protein catabolic process; F:ubiquitin protein ligase binding; F:ubiquitin binding
Phvul.001G201200	sister-chromatid cohesion protein 3	C:GO:0000785; F:GO:0003677; F:GO:0003682; C:GO:0005634; P:GO:0007062; C:GO:0008278	C:chromatin; F:DNA binding; F:chromatin binding; C:nucleus; P:sister chromatid cohesion; C:cohesin complex
Phvul.001G201300	peroxidase 3-like	F:GO:0004601; C:GO:0005576; P:GO:0006979; C:GO:0009505; C:GO:0009506; F:GO:0020037; P:GO:0042744; F:GO:0046872; P:GO:0055114; P:GO:0098869	F:peroxidase activity; C:extracellular region; P:response to oxidative stress; C:plant-type cell wall; C:plasmodesma; F:heme binding; P:hydrogen peroxide catabolic process; F:metal ion binding; P:oxidation-reduction process; P:cellular oxidant detoxification
Phvul.001G201400	rho GTPase-activating protein 2	P:GO:0007165	P:signal transduction
Phvul.001G201500	phosphopantothenoylcysteine decarboxylase subunit VHS3
Phvul.001G201600	RNA-binding protein BRN1	F:GO:0003729; C:GO:0005634; C:GO:0005737; C:GO:1990904	F:mRNA binding; C:nucleus; C:cytoplasm; C:ribonucleoprotein complex
Phvul.001G201700	hypothetical protein PHAVU_001G201700g
Phvul.001G201800	zerumbone synthase	P:GO:0055114; F:GO:0102069	P:oxidation-reduction process; F:zerumbone synthase activity
Phvul.001G201900	hypothetical protein PHAVU_001G201900g
Phvul.001G202000	auxin response factor 23-like	F:GO:0003677; C:GO:0005634; P:GO:0006355; P:GO:0009734	F:DNA binding; C:nucleus; P:regulation of transcription, DNA-templated; P:auxin-activated signaling pathway
Phvul.001G202100	probable indole-3-pyruvate monooxygenase YUCCA10	F:GO:0004499; F:GO:0050660; F:GO:0050661; P:GO:0055114; F:GO:0103075	F:N,N-dimethylaniline monooxygenase activity; F:flavin adenine dinucleotide binding; F:NADP binding; P:oxidation-reduction process; F:indole-3-pyruvate monooxygenase activity
Phvul.001G202200	probable indole-3-pyruvate monooxygenase YUCCA10	F:GO:0004499; F:GO:0005524; F:GO:0050660; F:GO:0050661; P:GO:0055114; F:GO:0103075	F:N,N-dimethylaniline monooxygenase activity; F:ATP binding; F:flavin adenine dinucleotide binding; F:NADP binding; P:oxidation-reduction process; F:indole-3-pyruvate monooxygenase activity
Phvul.001G202300	classical arabinogalactan protein 26	C:GO:0016021	C:integral component of membrane
Phvul.001G202400	protein NETWORKED 3A isoform X2	C:GO:0005774; C:GO:0005886; F:GO:0016301; P:GO:0016310; F:GO:0051015	C:vacuolar membrane; C:plasma membrane; F:kinase activity; P:phosphorylation; F:actin filament binding
Phvul.001G202500	---NA---
Phvul.001G202600	protein TRANSPORT INHIBITOR RESPONSE 1-like	F:GO:0000822; P:GO:0009734; F:GO:0010011; P:GO:0010152; P:GO:0010311; P:GO:0016036; C:GO:0019005; F:GO:0038198; P:GO:0048443	F:inositol hexakisphosphate binding; P:auxin-activated signaling pathway; F:auxin binding; P:pollen maturation; P:lateral root formation; P:cellular response to phosphate starvation; C:SCF ubiquitin ligase complex; F:auxin receptor activity; P:stamen development
Phvul.001G202700	hypothetical protein PHAVU_001G202700g	C:GO:0016021	C:integral component of membrane
Phvul.001G202800	stress response protein nst1	F:GO:0016874	F:ligase activity
Phvul.001G202900	CASP-like protein 1E1	C:GO:0005886; P:GO:0007043; C:GO:0016021; P:GO:0042545; C:GO:0048226; F:GO:0051539	C:plasma membrane; P:cell-cell junction assembly; C:integral component of membrane; P:cell wall modification; C:Casparian strip; F:4 iron, 4 sulfur cluster binding
Phvul.001G203000	zinc finger protein CONSTANS-LIKE 13	C:GO:0005634; F:GO:0008270	C:nucleus; F:zinc ion binding
Phvul.001G203100	membrane-anchored ubiquitin-fold protein 3	C:GO:0005886	C:plasma membrane
Phvul.001G203200	monothiol glutaredoxin-S11	F:GO:0004791; C:GO:0005623; C:GO:0005634; C:GO:0005737; F:GO:0009055; F:GO:0015035; P:GO:0022900; P:GO:0045454; P:GO:0098869	F:thioredoxin-disulfide reductase activity; C:cell; C:nucleus; C:cytoplasm; F:electron transfer activity; F:protein disulfide oxidoreductase activity; P:electron transport chain; P:cell redox homeostasis; P:cellular oxidant detoxification
Phvul.001G203300	glutaredoxin-C11	C:GO:0005623; F:GO:0009055; F:GO:0015035; P:GO:0022900; P:GO:0045454	C:cell; F:electron transfer activity; F:protein disulfide oxidoreductase activity; P:electron transport chain; P:cell redox homeostasis
Phvul.001G203400	OTU domain-containing protein 6B	F:GO:0004843; P:GO:0006508	F:thiol-dependent ubiquitin-specific protease activity; P:proteolysis
Phvul.001G203500	monothiol glutaredoxin-S6	F:GO:0004791; C:GO:0005623; F:GO:0009055; F:GO:0015035; P:GO:0022900; P:GO:0045454; P:GO:0098869	F:thioredoxin-disulfide reductase activity; C:cell; F:electron transfer activity; F:protein disulfide oxidoreductase activity; P:electron transport chain; P:cell redox homeostasis; P:cellular oxidant detoxification
Phvul.001G203600	monothiol glutaredoxin-S1-like	C:GO:0005623; F:GO:0009055; F:GO:0015035; P:GO:0022900; P:GO:0045454	C:cell; F:electron transfer activity; F:protein disulfide oxidoreductase activity; P:electron transport chain; P:cell redox homeostasis
Phvul.001G203700	hypothetical protein PHAVU_001G203700g
Phvul.001G203800	BTB/POZ domain-containing protein At1g03010 isoform X1
Phvul.001G203900	peptide chain release factor APG3, chloroplastic	P:GO:0006415; C:GO:0009507; P:GO:0009658; P:GO:0010027; F:GO:0016149; P:GO:0032544; F:GO:0043022	P:translational termination; C:chloroplast; P:chloroplast organization; P:thylakoid membrane organization; F:translation release factor activity, codon specific; P:plastid translation; F:ribosome binding
Phvul.001G204000	spermatogenesis-associated protein 20 isoform X1	F:GO:0003824; C:GO:0009507	F:catalytic activity; C:chloroplast
Phvul.001G204100	60S ribosomal protein L19-1-like	F:GO:0003723; F:GO:0003735; P:GO:0006412; C:GO:0022625	F:RNA binding; F:structural constituent of ribosome; P:translation; C:cytosolic large ribosomal subunit
Phvul.001G204200	dihydroneopterin aldolase 2-like	F:GO:0003676; F:GO:0004150; F:GO:0008270; P:GO:0046654; P:GO:0046656	F:nucleic acid binding; F:dihydroneopterin aldolase activity; F:zinc ion binding; P:tetrahydrofolate biosynthetic process; P:folic acid biosynthetic process
Phvul.002G304700	hypothetical protein PHAVU_002G304700g	C:GO:0000276; P:GO:0015986; F:GO:0046933	C:mitochondrial proton-transporting ATP synthase complex, coupling factor F(o); P:ATP synthesis coupled proton transport; F:proton-transporting ATP synthase activity, rotational mechanism
Phvul.002G304800	pollen-specific protein SF21-like	C:GO:0016021; F:GO:0016787	C:integral component of membrane; F:hydrolase activity
Phvul.002G304900	xaa-Pro dipeptidase	F:GO:0004177; P:GO:0006508; F:GO:0030145; F:GO:0102009	F:aminopeptidase activity; P:proteolysis; F:manganese ion binding; F:proline dipeptidase activity
Phvul.002G305000	1-aminocyclopropane-1-carboxylate synthase 7-like	F:GO:0003824; P:GO:0009058; F:GO:0030170	F:catalytic activity; P:biosynthetic process; F:pyridoxal phosphate binding
Phvul.002G305100	hypothetical protein PHAVU_002G305100g	C:GO:0000276; P:GO:0015986; F:GO:0046933	C:mitochondrial proton-transporting ATP synthase complex, coupling factor F(o); P:ATP synthesis coupled proton transport; F:proton-transporting ATP synthase activity, rotational mechanism
Phvul.002G305200	probable caffeoyl-CoA O-methyltransferase At4g26220	F:GO:0008171; P:GO:0032259	F:O-methyltransferase activity; P:methylation
Phvul.002G305300	40S ribosomal protein S15a-5	F:GO:0003735; P:GO:0006412; C:GO:0022627	F:structural constituent of ribosome; P:translation; C:cytosolic small ribosomal subunit
Phvul.002G305400	F-box/LRR-repeat protein At4g29420
Phvul.002G305500	zinc protease PQQL-like isoform X1	F:GO:0004222; P:GO:0006508; F:GO:0046872	F:metalloendopeptidase activity; P:proteolysis; F:metal ion binding
Phvul.002G305600	60S ribosomal protein L31	P:GO:0002181; F:GO:0003735; C:GO:0022625	P:cytoplasmic translation; F:structural constituent of ribosome; C:cytosolic large ribosomal subunit
Phvul.002G305700	hypothetical protein PHAVU_002G305700g	C:GO:0016021	C:integral component of membrane
Phvul.002G305800	asparagine--tRNA ligase, cytoplasmic 1	F:GO:0003676; F:GO:0004816; F:GO:0005524; P:GO:0006421	F:nucleic acid binding; F:asparagine-tRNA ligase activity; F:ATP binding; P:asparaginyl-tRNA aminoacylation
Phvul.002G305900	vacuolar protein sorting-associated protein 32 homolog 2	P:GO:0007034	P:vacuolar transport
Phvul.002G306000	transcription factor MYB36-like	F:GO:0003700; C:GO:0005634; P:GO:0006355; C:GO:0016021; P:GO:0030154; F:GO:0043565; F:GO:0044212	F:DNA-binding transcription factor activity; C:nucleus; P:regulation of transcription, DNA-templated; C:integral component of membrane; P:cell differentiation; F:sequence-specific DNA binding; F:transcription regulatory region DNA binding
Phvul.005G126600	dehydration-responsive element-binding protein 1F-like	F:GO:0003677; F:GO:0003700; C:GO:0005634; P:GO:0006355	F:DNA binding; F:DNA-binding transcription factor activity; C:nucleus; P:regulation of transcription, DNA-templated
Phvul.005G126700	hypothetical protein PHAVU_005G126700g
Phvul.005G126800	probable ribosome biogenesis protein RLP24	P:GO:0000027; F:GO:0003723; F:GO:0003735; P:GO:0006412; C:GO:0022625; P:GO:1902626	P:ribosomal large subunit assembly; F:RNA binding; F:structural constituent of ribosome; P:translation; C:cytosolic large ribosomal subunit; P:assembly of large subunit precursor of preribosome
Phvul.005G126900	RNase P Rpr2/Rpp21 subunit domain-containing protein
Phvul.005G127000	nucleobase-ascorbate transporter 12	C:GO:0005886; C:GO:0016021; F:GO:0022857; P:GO:0055085	C:plasma membrane; C:integral component of membrane; F:transmembrane transporter activity; P:transmembrane transport
Phvul.005G127100	arogenate dehydratase/prephenate dehydratase 6, chloroplastic-like	F:GO:0004664; P:GO:0009094; C:GO:0009570; F:GO:0047769	F:prephenate dehydratase activity; P:L-phenylalanine biosynthetic process; C:chloroplast stroma; F:arogenate dehydratase activity
Phvul.005G127200	putative phytosulfokines 6 isoform X1	C:GO:0005576; P:GO:0007165; F:GO:0008083; P:GO:0008283	C:extracellular region; P:signal transduction; F:growth factor activity; P:cell population proliferation
Phvul.005G127300	protein TIC 100
Phvul.005G127400	actin-related protein 2/3 complex subunit 1B-like isoform X1	C:GO:0005737; C:GO:0005885; P:GO:0034314; F:GO:0051015	C:cytoplasm; C:Arp2/3 protein complex; P:Arp2/3 complex-mediated actin nucleation; F:actin filament binding
Phvul.005G127500	hypothetical protein PHAVU_005G127500g
Phvul.005G127600	histone deacetylase HDT1	F:GO:0003676; C:GO:0005730; P:GO:0010162; P:GO:0045892	F:nucleic acid binding; C:nucleolus; P:seed dormancy process; P:negative regulation of transcription, DNA-templated
Phvul.005G127700	splicing factor U2af small subunit B-like	P:GO:0000398; C:GO:0005681; F:GO:0030628; F:GO:0046872; C:GO:0089701	P:mRNA splicing, via spliceosome; C:spliceosomal complex; F:pre-mRNA 3'-splice site binding; F:metal ion binding; C:U2AF
Phvul.005G127800	splicing factor U2af small subunit B-like	P:GO:0000398; C:GO:0005681; F:GO:0030628; F:GO:0046872; C:GO:0089701	P:mRNA splicing, via spliceosome; C:spliceosomal complex; F:pre-mRNA 3'-splice site binding; F:metal ion binding; C:U2AF
Phvul.005G127900	AT-hook motif nuclear-localized protein 9-like	F:GO:0003677; F:GO:0003680	F:DNA binding; F:AT DNA binding
Phvul.005G128000	DNA repair protein RAD5A isoform X1	F:GO:0003676; F:GO:0005524; F:GO:0008270; F:GO:0016818	F:nucleic acid binding; F:ATP binding; F:zinc ion binding; F:hydrolase activity, acting on acid anhydrides, in phosphorus-containing anhydrides
Phvul.005G128100	DDT domain-containing protein PTM-like	F:GO:0046872	F:metal ion binding
Phvul.005G128200	AP-2 complex subunit alpha-1	P:GO:0006886; C:GO:0030122; F:GO:0035615; P:GO:0072583	P:intracellular protein transport; C:AP-2 adaptor complex; F:clathrin adaptor activity; P:clathrin-dependent endocytosis
Phvul.005G128300	protein RETICULATA-RELATED 1, chloroplastic	C:GO:0005739; C:GO:0009706; C:GO:0016021; P:GO:0099402	C:mitochondrion; C:chloroplast inner membrane; C:integral component of membrane; P:plant organ development
Phvul.005G128400	BTB/POZ domain-containing protein At3g44820
Phvul.005G128500	UDP-D-apiose/UDP-D-xylose synthase 2	F:GO:0003824; F:GO:0050662	F:catalytic activity; F:coenzyme binding
Phvul.005G128600	GDSL esterase/lipase At5g22810	F:GO:0004806; P:GO:0006629	F:triglyceride lipase activity; P:lipid metabolic process
Phvul.005G128700	protein saal1 isoform X2
Phvul.005G128800	magnesium transporter MRS2-11, chloroplastic	C:GO:0009941; P:GO:0010027; P:GO:0010117; P:GO:0010960; F:GO:0015095; C:GO:0016021; P:GO:1903830	C:chloroplast envelope; P:thylakoid membrane organization; P:photoprotection; P:magnesium ion homeostasis; F:magnesium ion transmembrane transporter activity; C:integral component of membrane; P:magnesium ion transmembrane transport
Phvul.005G128900	SRSF protein kinase 1-like	P:GO:0000245; F:GO:0004674; F:GO:0005524; C:GO:0005634; C:GO:0005737; P:GO:0006468; P:GO:0035556; P:GO:0050684	P:spliceosomal complex assembly; F:protein serine/threonine kinase activity; F:ATP binding; C:nucleus; C:cytoplasm; P:protein phosphorylation; P:intracellular signal transduction; P:regulation of mRNA processing
Phvul.005G129000	aspartic proteinase-like protein 2	F:GO:0004190; P:GO:0006508; C:GO:0016021; P:GO:0030163	F:aspartic-type endopeptidase activity; P:proteolysis; C:integral component of membrane; P:protein catabolic process
Phvul.005G129100	lysosomal Pro-X carboxypeptidase-like	F:GO:0004180; P:GO:0006508; F:GO:0008236; F:GO:0008239; C:GO:0016021	F:carboxypeptidase activity; P:proteolysis; F:serine-type peptidase activity; F:dipeptidyl-peptidase activity; C:integral component of membrane
Phvul.005G129200	lysosomal Pro-X carboxypeptidase	F:GO:0004180; P:GO:0006508; F:GO:0008236; F:GO:0008239; C:GO:0016021	F:carboxypeptidase activity; P:proteolysis; F:serine-type peptidase activity; F:dipeptidyl-peptidase activity; C:integral component of membrane
Phvul.005G129300	lysosomal Pro-X carboxypeptidase	F:GO:0004180; P:GO:0006508; F:GO:0008236; F:GO:0008239; C:GO:0016021	F:carboxypeptidase activity; P:proteolysis; F:serine-type peptidase activity; F:dipeptidyl-peptidase activity; C:integral component of membrane
Phvul.005G129400	lysosomal Pro-X carboxypeptidase-like	F:GO:0004180; P:GO:0006508; F:GO:0008236; F:GO:0008239	F:carboxypeptidase activity; P:proteolysis; F:serine-type peptidase activity; F:dipeptidyl-peptidase activity
Phvul.005G129500	lysosomal Pro-X carboxypeptidase	F:GO:0004180; P:GO:0006508; F:GO:0008236; F:GO:0008239	F:carboxypeptidase activity; P:proteolysis; F:serine-type peptidase activity; F:dipeptidyl-peptidase activity
Phvul.005G129600	calcium-binding protein CP1	F:GO:0005509	F:calcium ion binding
Phvul.005G129700	RING finger protein PFF0165c isoform X2
Phvul.005G129800	hypothetical protein PHAVU_005G129800g	F:GO:0000977; F:GO:0003682; C:GO:0005634; F:GO:0042393; P:GO:0045944; F:GO:0046872	F:RNA polymerase II regulatory region sequence-specific DNA binding; F:chromatin binding; C:nucleus; F:histone binding; P:positive regulation of transcription by RNA polymerase II; F:metal ion binding
Phvul.005G129900	uncharacterized isomerase BH0283-like	P:GO:0009058; F:GO:0102943	P:biosynthetic process; F:trans-2,3-dihydro-3-hydroxy-anthranilate isomerase activity
Phvul.005G130000	serine carboxypeptidase-like 51	F:GO:0004185; P:GO:0051603	F:serine-type carboxypeptidase activity; P:proteolysis involved in cellular protein catabolic process
Phvul.005G130100	protein SENSITIVE TO PROTON RHIZOTOXICITY 2-like	F:GO:0003676	F:nucleic acid binding
Phvul.005G130200	hypothetical protein PHAVU_005G130200g, partial
Phvul.005G130300	zinc finger protein ZAT5-like	F:GO:0003676	F:nucleic acid binding
Phvul.005G130400	hypothetical protein PHAVU_005G130400g	P:GO:0000184	P:nuclear-transcribed mRNA catabolic process, nonsense-mediated decay
Phvul.005G130500	transcription factor FER-LIKE IRON DEFICIENCY-INDUCED TRANSCRIPTION FACTOR	F:GO:0046983	F:protein dimerization activity
Phvul.005G130600	protein UPSTREAM OF FLC isoform X1
Phvul.005G130700	protein enabled homolog
Phvul.005G130800	probable glucuronoxylan glucuronosyltransferase IRX7	P:GO:0006486; P:GO:0010417; C:GO:0016021; F:GO:0102983	P:protein glycosylation; P:glucuronoxylan biosynthetic process; C:integral component of membrane; F:xylogalacturonan beta-1,3-xylosyltransferase activity
Phvul.005G130900	xyloglucan endotransglucosylase/hydrolase protein 31-like	F:GO:0004553; C:GO:0005618; P:GO:0010411; F:GO:0016762; P:GO:0042546; C:GO:0048046; P:GO:0071555	F:hydrolase activity, hydrolyzing O-glycosyl compounds; C:cell wall; P:xyloglucan metabolic process; F:xyloglucan:xyloglucosyl transferase activity; P:cell wall biogenesis; C:apoplast; P:cell wall organization
Phvul.005G131000	serine carboxypeptidase-like	F:GO:0004185; C:GO:0005773; P:GO:0051603	F:serine-type carboxypeptidase activity; C:vacuole; P:proteolysis involved in cellular protein catabolic process
Phvul.005G131100	hypothetical protein PHAVU_005G131100g
Phvul.005G131200	alpha-L-fucosidase 1	F:GO:0004560; C:GO:0005764; P:GO:0006004; C:GO:0016021; P:GO:0016139	F:alpha-L-fucosidase activity; C:lysosome; P:fucose metabolic process; C:integral component of membrane; P:glycoside catabolic process
Phvul.005G131300	transcription factor RAX2-like	F:GO:0003700; C:GO:0005634; P:GO:0006355; P:GO:0030154; F:GO:0043565; F:GO:0044212	F:DNA-binding transcription factor activity; C:nucleus; P:regulation of transcription, DNA-templated; P:cell differentiation; F:sequence-specific DNA binding; F:transcription regulatory region DNA binding
Phvul.005G131400	4-coumarate--CoA ligase-like 7	C:GO:0016021; F:GO:0016491; F:GO:0016874; P:GO:0055114	C:integral component of membrane; F:oxidoreductase activity; F:ligase activity; P:oxidation-reduction process
Phvul.005G131500	heavy metal-associated isoprenylated plant protein 3-like	P:GO:0030001; F:GO:0046872	P:metal ion transport; F:metal ion binding
Phvul.005G131600	ABC transporter F family member 1-like	F:GO:0005524; F:GO:0016887	F:ATP binding; F:ATPase activity
Phvul.005G131700	hypothetical protein PHAVU_005G131700g	F:GO:0003723	F:RNA binding
Phvul.005G131800	auxin-responsive protein SAUR50	P:GO:0009733	P:response to auxin
Phvul.005G131900	dolichol kinase EVAN isoform X2	F:GO:0004168; P:GO:0016310; C:GO:0030176; P:GO:0043048	F:dolichol kinase activity; P:phosphorylation; C:integral component of endoplasmic reticulum membrane; P:dolichyl monophosphate biosynthetic process
Phvul.005G132000	ABC transporter G family member 3	F:GO:0005524; C:GO:0005886; F:GO:0015419; C:GO:0016021; F:GO:0016887; P:GO:1902358	F:ATP binding; C:plasma membrane; F:ATPase-coupled sulfate transmembrane transporter activity; C:integral component of membrane; F:ATPase activity; P:sulfate transmembrane transport
Phvul.010G029800	TMV resistance protein N-like	P:GO:0007165; F:GO:0043531	P:signal transduction; F:ADP binding
Phvul.010G029900	E3 ubiquitin-protein ligase CHIP	F:GO:0004839; F:GO:0004842; P:GO:0016567; F:GO:0016746	F:ubiquitin activating enzyme activity; F:ubiquitin-protein transferase activity; P:protein ubiquitination; F:transferase activity, transferring acyl groups
Phvul.010G030000	sugar transport protein 1-like	P:GO:0008643; C:GO:0016021; F:GO:0022857; P:GO:0055085	P:carbohydrate transport; C:integral component of membrane; F:transmembrane transporter activity; P:transmembrane transport
Phvul.010G030100	serine/threonine-protein kinase OXI1-like	F:GO:0004674; F:GO:0005524; C:GO:0005634; C:GO:0005737; C:GO:0005886; P:GO:0006468	F:protein serine/threonine kinase activity; F:ATP binding; C:nucleus; C:cytoplasm; C:plasma membrane; P:protein phosphorylation
Phvul.010G030200	DNA-directed RNA polymerase II subunit 4	F:GO:0000166; P:GO:0000288; C:GO:0000932; F:GO:0003697; F:GO:0003727; F:GO:0003899; C:GO:0005665; P:GO:0006367; F:GO:0031369; P:GO:0031990; P:GO:0034402; P:GO:0045948	F:nucleotide binding; P:nuclear-transcribed mRNA catabolic process, deadenylation-dependent decay; C:P-body; F:single-stranded DNA binding; F:single-stranded RNA binding; F:DNA-directed 5'-3' RNA polymerase activity; C:RNA polymerase II, core complex; P:transcription initiation from RNA polymerase II promoter; F:translation initiation factor binding; P:mRNA export from nucleus in response to heat…
Phvul.010G030300	sugar transport protein 1-like	P:GO:0008643; C:GO:0016021; F:GO:0022857; P:GO:0055085	P:carbohydrate transport; C:integral component of membrane; F:transmembrane transporter activity; P:transmembrane transport
Phvul.010G030400	hypothetical protein PHAVU_011G0934000g, partial	F:GO:0008270	F:zinc ion binding
Phvul.010G030500	auxin-induced in root cultures protein 12	C:GO:0016021	C:integral component of membrane
Phvul.010G030600	PREDICTED: uncharacterized protein LOC108347394 isoform X1	F:GO:0005525; P:GO:0006629; C:GO:0016021; F:GO:0016787	F:GTP binding; P:lipid metabolic process; C:integral component of membrane; F:hydrolase activity
Phvul.010G030700	exocyst complex component SEC15A	C:GO:0000145; C:GO:0005829; P:GO:0006893; P:GO:0006904; P:GO:0009846; P:GO:0009860; P:GO:0060321	C:exocyst; C:cytosol; P:Golgi to plasma membrane transport; P:vesicle docking involved in exocytosis; P:pollen germination; P:pollen tube growth; P:acceptance of pollen
Phvul.010G030800	asparagine--tRNA ligase, cytoplasmic 2	F:GO:0004816; F:GO:0005524; C:GO:0005737; P:GO:0006421; C:GO:0043231	F:asparagine-tRNA ligase activity; F:ATP binding; C:cytoplasm; P:asparaginyl-tRNA aminoacylation; C:intracellular membrane-bounded organelle
Phvul.010G030900	hypothetical protein PHAVU_010G030900g	F:GO:0003677	F:DNA binding
